# Supplementary material for: The Effect of Regular Exercise on Insulin Sensitivity in Type 2 Diabetes Mellitus: A Systematic Review and Meta-Analysis
Source: PubMed Central journal article supplement — Diabetes Metab J. 2016 Aug 2;40(4):253–71. doi: 10.4093/dmj.2016.40.4.253 (PMC4995180; doi:10.4093/dmj.2016.40.4.253), 2016-08-02
Supplement: dmj-40-253-s001.pdf [file dmj-40-253-s001.pdf]

**Supplementary Table 1.** Results of the modified from Downs et al. [15] methodological quality assessment

| Author                          | Reporting, item no. <sup>a</sup> |   |   |   |   |   |   |   |   |    | External validity, item no. <sup>b</sup> |                |    |    |                | Internal validity, item no. |                |    |                |    | Additional criterion, item no. |                |                | Total score    |                |    |    |    |    |
|---------------------------------|----------------------------------|---|---|---|---|---|---|---|---|----|------------------------------------------|----------------|----|----|----------------|-----------------------------|----------------|----|----------------|----|--------------------------------|----------------|----------------|----------------|----------------|----|----|----|----|
|                                 | 1                                | 2 | 3 | 4 | 5 | 6 | 7 | 8 | 9 | 10 | 11                                       | 12             | 13 | 14 | 15             | 16                          | 17             | 18 | 19             | 20 | 21                             | 22             | 23             |                | 24             | 25 | 26 | 27 | 28 |
| Baldi et al. (2003) [20]        | 1                                | 1 | 1 | 1 | 1 | 1 | 1 | 1 | 0 | 0  | 1                                        | 0 <sup>c</sup> | 1  | 0  | 0 <sup>c</sup> | 1                           | 1              | 1  | 0 <sup>c</sup> | 1  | 0 <sup>c</sup>                 | 1              | 0 <sup>c</sup> | 0 <sup>c</sup> | 0 <sup>c</sup> | 1  | 1  | 1  | 18 |
| Boudou et al. (2003) [21]       | 1                                | 1 | 1 | 1 | 1 | 1 | 1 | 0 | 0 | 1  | 1                                        | 0 <sup>c</sup> | 1  | 0  | 0 <sup>c</sup> | 1                           | 1              | 1  | 0 <sup>c</sup> | 1  | 1                              | 0 <sup>c</sup> | 1              | 0 <sup>c</sup> | 0 <sup>c</sup> | 1  | 0  | 1  | 18 |
| Cuff et al. (2003) [19]         | 1                                | 1 | 1 | 1 | 1 | 1 | 1 | 0 | 0 | 0  | 1                                        | 0              | 1  | 0  | 0 <sup>c</sup> | 1                           | 1              | 1  | 0 <sup>c</sup> | 1  | 1                              | 0 <sup>c</sup> | 1              | 0 <sup>c</sup> | 0 <sup>c</sup> | 1  | 1  | 1  | 18 |
| Dunstan et al. (1997) [17]      | 1                                | 1 | 1 | 1 | 1 | 1 | 1 | 1 | 1 | 1  | 1                                        | 1              | 1  | 0  | 0 <sup>c</sup> | 1                           | 1              | 1  | 1              | 1  | 1                              | 0 <sup>c</sup> | 1              | 0 <sup>c</sup> | 0 <sup>c</sup> | 1  | 1  | 1  | 23 |
| Dunstan et al. (1998) [22]      | 1                                | 1 | 1 | 1 | 1 | 1 | 1 | 0 | 1 | 1  | 1                                        | 0              | 1  | 0  | 0 <sup>c</sup> | 1                           | 1              | 1  | 0 <sup>c</sup> | 1  | 1                              | 0 <sup>c</sup> | 1              | 0 <sup>c</sup> | 0 <sup>c</sup> | 1  | 0  | 1  | 20 |
| Karstoft et al. (2013) [24]     | 1                                | 1 | 1 | 1 | 1 | 1 | 1 | 0 | 1 | 1  | 1                                        | 1              | 1  | 0  | 0 <sup>c</sup> | 1                           | 1              | 1  | 0 <sup>c</sup> | 1  | 1                              | 0 <sup>c</sup> | 1              | 0 <sup>c</sup> | 0 <sup>c</sup> | 1  | 1  | 0  | 20 |
| Ligtenberg et al. (1997) [28]   | 1                                | 1 | 1 | 1 | 1 | 1 | 1 | 1 | 0 | 1  | 1                                        | 1              | 1  | 0  | 0 <sup>c</sup> | 1                           | 1              | 1  | 1              | 1  | 1                              | 0 <sup>c</sup> | 1              | 0 <sup>c</sup> | 1              | 1  | 1  | 1  | 24 |
| Middlebrooke et al. (2006) [29] | 1                                | 1 | 1 | 1 | 0 | 1 | 1 | 1 | 1 | 1  | 1                                        | 0              | 1  | 0  | 0 <sup>c</sup> | 1                           | 0 <sup>c</sup> | 1  | 1              | 1  | 1                              | 0 <sup>c</sup> | 1              | 0 <sup>c</sup> | 1              | 1  | 1  | 1  | 21 |
| Mourier et al. (1997) [30]      | 1                                | 1 | 1 | 1 | 1 | 1 | 1 | 1 | 1 | 0  | 1                                        | 0              | 1  | 0  | 0 <sup>c</sup> | 1                           | 1              | 1  | 1              | 1  | 1                              | 0 <sup>c</sup> | 1              | 0 <sup>c</sup> | 0 <sup>c</sup> | 1  | 1  | 1  | 21 |
| Okada et al. (2010) [23]        | 1                                | 1 | 1 | 1 | 1 | 1 | 1 | 1 | 0 | 1  | 0                                        | 1              | 0  | 0  | 0 <sup>c</sup> | 1                           | 0 <sup>c</sup> | 1  | 0 <sup>c</sup> | 1  | 1                              | 0 <sup>c</sup> | 1              | 0 <sup>c</sup> | 1              | 1  | 0  | 1  | 20 |
| Ronnemaa et al. (1986) [31]     | 1                                | 1 | 1 | 1 | 1 | 1 | 1 | 0 | 1 | 0  | 1                                        | 1              | 1  | 0  | 0 <sup>c</sup> | 1                           | 0 <sup>c</sup> | 1  | 1              | 1  | 1                              | 0 <sup>c</sup> | 1              | 0 <sup>c</sup> | 0 <sup>c</sup> | 1  | 0  | 0  | 18 |
| Tamura et al. (2005) [18]       | 1                                | 1 | 1 | 1 | 1 | 1 | 1 | 0 | 0 | 1  | 1                                        | 0              | 1  | 0  | 0 <sup>c</sup> | 1                           | 1              | 1  | 0 <sup>c</sup> | 1  | 1                              | 0 <sup>c</sup> | 1              | 0 <sup>c</sup> | 0 <sup>c</sup> | 1  | 0  | 0  | 17 |
| Tan et al. (2012) [25]          | 1                                | 1 | 1 | 1 | 1 | 1 | 1 | 1 | 0 | 1  | 0                                        | 1              | 0  | 0  | 0 <sup>c</sup> | 1                           | 1              | 1  | 0 <sup>c</sup> | 1  | 1                              | 0 <sup>c</sup> | 1              | 0 <sup>c</sup> | 0 <sup>c</sup> | 1  | 1  | 1  | 19 |
| Tessier et al. (2000) [26]      | 1                                | 1 | 1 | 1 | 1 | 1 | 1 | 0 | 1 | 0  | 1                                        | 0              | 1  | 0  | 0 <sup>c</sup> | 1                           | 0 <sup>c</sup> | 1  | 0 <sup>c</sup> | 1  | 1                              | 0 <sup>c</sup> | 1              | 0 <sup>c</sup> | 0 <sup>c</sup> | 1  | 1  | 1  | 18 |
| Wing et al. (1988) [32]         | 1                                | 1 | 1 | 1 | 1 | 1 | 1 | 0 | 0 | 0  | 1                                        | 0              | 1  | 0  | 0 <sup>c</sup> | 1                           | 0 <sup>c</sup> | 1  | 0 <sup>c</sup> | 1  | 1                              | 0 <sup>c</sup> | 1              | 0 <sup>c</sup> | 0 <sup>c</sup> | 1  | 1  | 0  | 16 |
| Winnick et al. (2008) [27]      | 1                                | 1 | 1 | 1 | 1 | 1 | 1 | 0 | 1 | 0  | 1                                        | 0              | 1  | 0  | 0 <sup>c</sup> | 1                           | 1              | 1  | 0 <sup>c</sup> | 1  | 1                              | 0 <sup>c</sup> | 1              | 0 <sup>c</sup> | 0 <sup>c</sup> | 1  | 1  | 1  | 19 |

1 = criteria met; 0 = criteria not met.

<sup>a</sup>Reporting category includes items such as study aims, reported outcomes, patient characteristics, confounders, adverse events, and loss to follow-up. <sup>b</sup>External validity includes questions regarding to the study population. <sup>c</sup>Bias includes items such as blinding, follow-up and compliance. <sup>d</sup>Confounding includes items such as study selection, randomization, and study power. <sup>e</sup>Unable to determine, scored 0.
