# Supplementary figures and images for: The Effect of Regular Exercise on Insulin Sensitivity in Type 2 Diabetes Mellitus: A Systematic Review and Meta-Analysis
Source: PubMed Central journal article supplement — Diabetes Metab J. 2016 Aug 2;40(4):253–71. doi: 10.4093/dmj.2016.40.4.253 (PMC4995180; doi:10.4093/dmj.2016.40.4.253), 2016-08-02

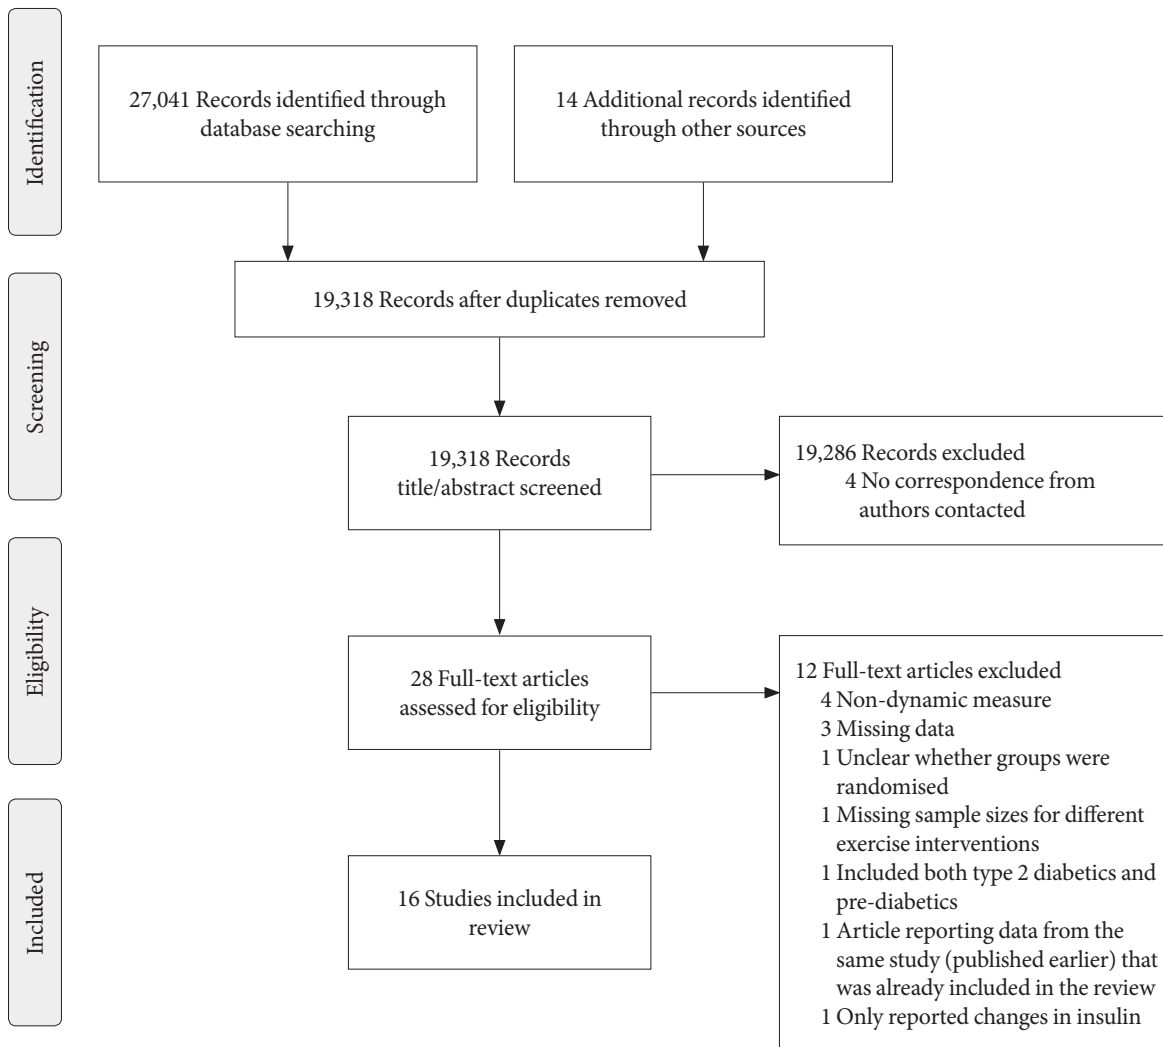

Supplementary Fig. 1. Search strategy flow diagram.

Supplement: dmj-40-253-s002.pdf [file dmj-40-253-s002.pdf]
